# Supplementary material for: Synthesis of a common tetrasaccharide motif of Haemophilus influenzae LPS inner core structures
Source: Royal Society of Chemistry journal article supplement (doi:10.1039/b717564g), 2008-01-01
Supplement: b717564g.pdf [file b717564g.pdf]

400 MHz  
6/7-05  
30°C

| INDEX | FREQUENCY | PPM   | HEIGHT | INDEX | FREQUENCY | PPM   | HEIGHT |
|-------|-----------|-------|--------|-------|-----------|-------|--------|
| 1     | 2243.776  | 5.610 | 29.4   | 40    | 1441.360  | 3.604 | 29.8   |
| 2     | 2020.608  | 5.052 | 30.3   | 41    | 1435.502  | 3.589 | 24.9   |
| 3     | 1923.944  | 4.811 | 36.0   | 42    | 1432.939  | 3.583 | 22.3   |
| 4     | 1858.221  | 4.646 | 3003.3 | 43    | 1429.277  | 3.574 | 20.7   |
| 5     | 1849.799  | 4.625 | 43.3   | 44    | 1365.201  | 3.414 | 24.2   |
| 6     | 1844.856  | 4.613 | 30.7   | 45    | 1356.231  | 3.391 | 28.9   |
| 7     | 1838.266  | 4.596 | 25.1   | 46    | 1348.358  | 3.371 | 20.1   |
| 8     | 1833.872  | 4.585 | 20.4   | 47    | 1340.669  | 3.352 | 20.1   |
| 9     | 1799.820  | 4.500 | 26.9   | 48    | 1283.550  | 3.209 | 24.6   |
| 10    | 1792.314  | 4.481 | 26.1   |       |           |       |        |
| 11    | 1685.032  | 4.213 | 22.1   |       |           |       |        |
| 12    | 1644.390  | 4.112 | 21.8   |       |           |       |        |
| 13    | 1615.830  | 4.040 | 20.2   |       |           |       |        |
| 14    | 1609.240  | 4.024 | 32.7   |       |           |       |        |
| 15    | 1601.733  | 4.005 | 27.7   |       |           |       |        |
| 16    | 1596.607  | 3.992 | 23.4   |       |           |       |        |
| 17    | 1589.284  | 3.974 | 29.1   |       |           |       |        |
| 18    | 1576.103  | 3.941 | 42.9   |       |           |       |        |
| 19    | 1572.991  | 3.933 | 28.5   |       |           |       |        |
| 20    | 1571.343  | 3.929 | 23.2   |       |           |       |        |
| 21    | 1565.119  | 3.913 | 22.7   |       |           |       |        |
| 22    | 1544.980  | 3.863 | 31.2   |       |           |       |        |
| 23    | 1541.685  | 3.855 | 41.5   |       |           |       |        |
| 24    | 1532.714  | 3.832 | 34.3   |       |           |       |        |
| 25    | 1522.828  | 3.808 | 27.0   |       |           |       |        |
| 26    | 1514.407  | 3.787 | 23.5   |       |           |       |        |
| 27    | 1510.379  | 3.777 | 28.8   |       |           |       |        |
| 28    | 1500.859  | 3.753 | 47.5   |       |           |       |        |
| 29    | 1495.733  | 3.740 | 25.7   |       |           |       |        |
| 30    | 1492.072  | 3.731 | 39.7   |       |           |       |        |
| 31    | 1489.875  | 3.725 | 45.9   |       |           |       |        |
| 32    | 1485.115  | 3.713 | 23.0   |       |           |       |        |
| 33    | 1478.707  | 3.697 | 27.2   |       |           |       |        |
| 34    | 1474.314  | 3.686 | 41.0   |       |           |       |        |
| 35    | 1467.906  | 3.670 | 48.8   |       |           |       |        |
| 36    | 1464.061  | 3.661 | 34.9   |       |           |       |        |
| 37    | 1461.865  | 3.655 | 39.2   |       |           |       |        |
| 38    | 1456.922  | 3.643 | 39.1   |       |           |       |        |
| 39    | 1452.162  | 3.631 | 31.8   |       |           |       |        |

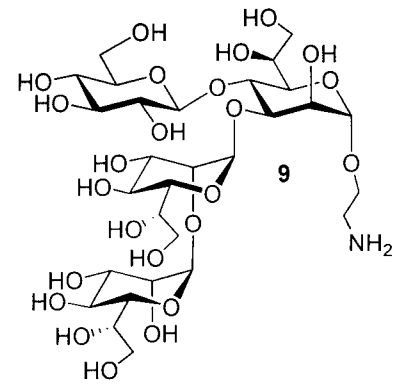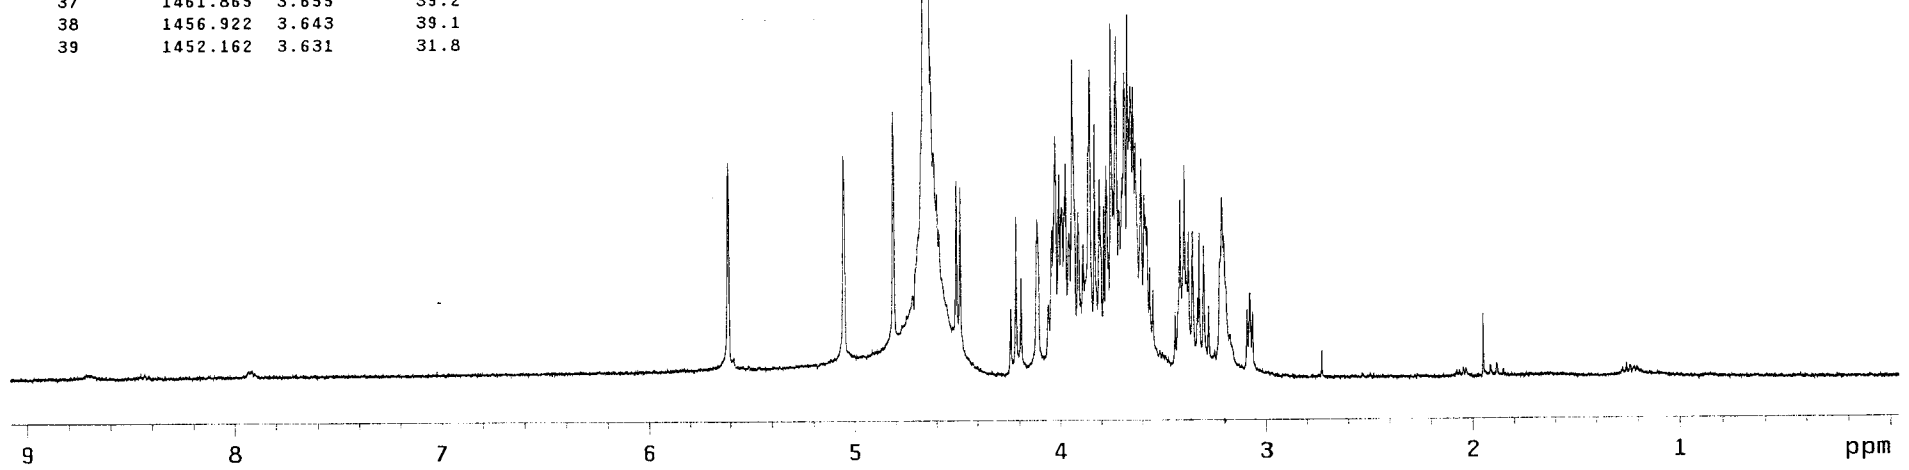

1.00 0.90 0.71 17.55 1.49  
1.02 0.83 0.69 2.97 0.49

2017-05  
30°C  
400 MHz

| INDEX | FREQUENCY PPM | HEIGHT | INDEX  | FREQUENCY PPM | HEIGHT   |       |       |
|-------|---------------|--------|--------|---------------|----------|-------|-------|
| 1     | 2279.292      | 5.699  | 23.9   | 40            | 1363.737 | 3.410 | 24.3  |
| 2     | 2017.679      | 5.045  | 24.2   | 41            | 1354.766 | 3.387 | 30.4  |
| 3     | 1920.283      | 4.801  | 31.0   | 42            | 1331.699 | 3.330 | 21.5  |
| 4     | 1883.302      | 4.709  | 24.6   | 43            | 1309.364 | 3.274 | 21.7  |
| 5     | 1858.038      | 4.646  | 6914.1 | 44            | 1304.237 | 3.261 | 33.6  |
| 6     | 1846.138      | 4.616  | 29.0   | 45            | 1284.099 | 3.211 | 21.9  |
| 7     | 1838.083      | 4.596  | 23.7   | 46            | 1279.522 | 3.199 | 31.8  |
| 8     | 1800.369      | 4.502  | 24.7   | 47            | 737.439  | 1.844 | 40.8  |
| 9     | 1792.863      | 4.483  | 24.3   | 48            | 552.717  | 1.382 | 266.5 |
| 10    | 1690.525      | 4.227  | 21.9   |               |          |       |       |
| 11    | 1637.982      | 4.096  | 23.9   |               |          |       |       |
| 12    | 1620.590      | 4.052  | 28.7   |               |          |       |       |
| 13    | 1618.942      | 4.048  | 26.3   |               |          |       |       |
| 14    | 1612.901      | 4.033  | 27.6   |               |          |       |       |
| 15    | 1603.015      | 4.008  | 22.7   |               |          |       |       |
| 16    | 1571.160      | 3.929  | 22.1   |               |          |       |       |
| 17    | 1568.048      | 3.921  | 29.6   |               |          |       |       |
| 18    | 1566.217      | 3.916  | 38.3   |               |          |       |       |
| 19    | 1561.640      | 3.905  | 34.9   |               |          |       |       |
| 20    | 1555.233      | 3.889  | 45.2   |               |          |       |       |
| 21    | 1544.797      | 3.863  | 31.7   |               |          |       |       |
| 22    | 1541.685      | 3.855  | 33.1   |               |          |       |       |
| 23    | 1538.390      | 3.847  | 36.4   |               |          |       |       |
| 24    | 1535.094      | 3.838  | 36.8   |               |          |       |       |
| 25    | 1532.165      | 3.831  | 58.9   |               |          |       |       |
| 26    | 1526.856      | 3.818  | 27.7   |               |          |       |       |
| 27    | 1521.181      | 3.804  | 36.7   |               |          |       |       |
| 28    | 1507.999      | 3.771  | 29.3   |               |          |       |       |
| 29    | 1497.198      | 3.744  | 34.0   |               |          |       |       |
| 30    | 1490.607      | 3.727  | 26.4   |               |          |       |       |
| 31    | 1486.030      | 3.716  | 37.0   |               |          |       |       |
| 32    | 1476.327      | 3.691  | 36.2   |               |          |       |       |
| 33    | 1474.497      | 3.687  | 29.5   |               |          |       |       |
| 34    | 1466.991      | 3.668  | 29.1   |               |          |       |       |
| 35    | 1461.865      | 3.655  | 28.1   |               |          |       |       |
| 36    | 1455.640      | 3.640  | 45.9   |               |          |       |       |
| 37    | 1447.219      | 3.619  | 33.3   |               |          |       |       |
| 38    | 1444.289      | 3.611  | 30.7   |               |          |       |       |
| 39    | 1435.685      | 3.590  | 20.2   |               |          |       |       |

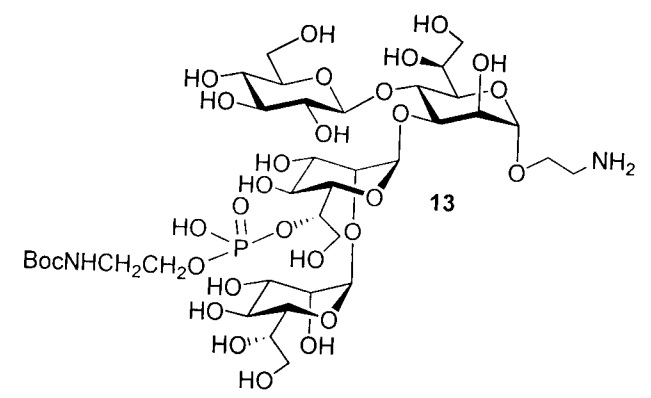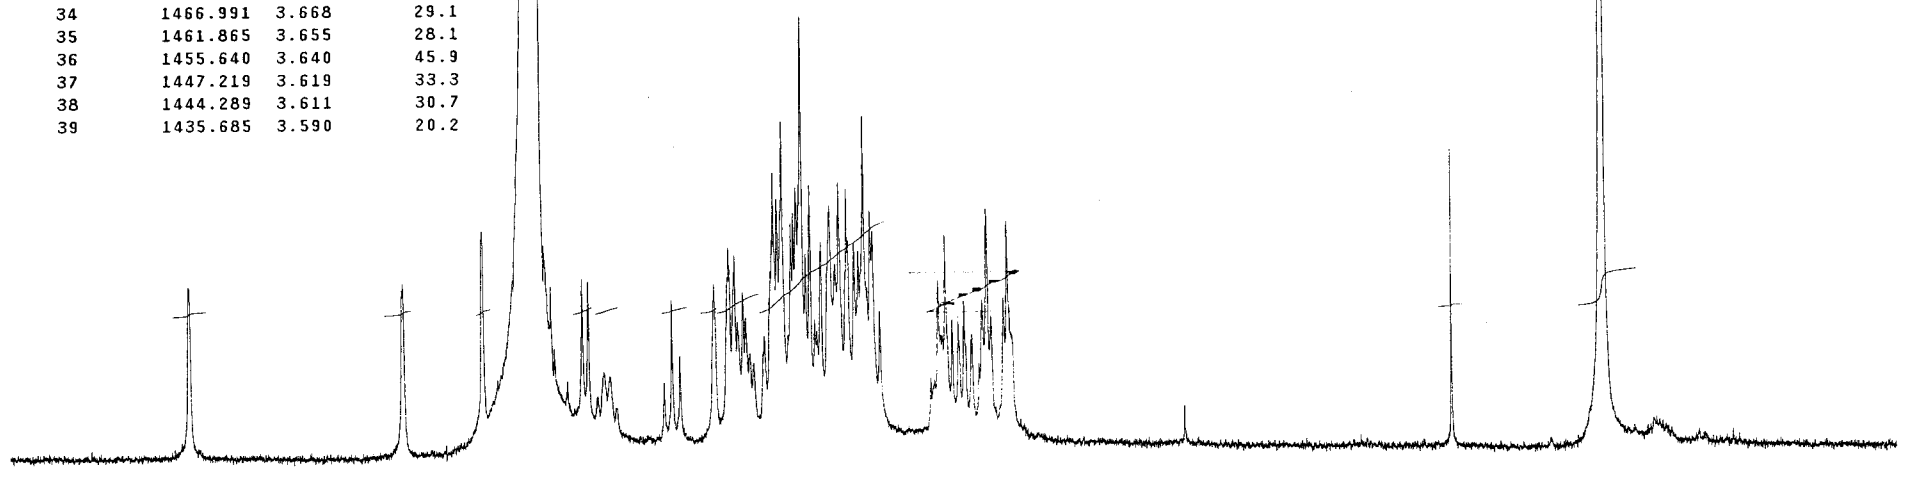

6.0 5.5 5.0 4.5 4.0 3.5 3.0 2.5 2.0 1.5 1.0 ppm

1.00 0.94 1.17 1.32 1.40 1.00 1.22 3.79 18.32 7.90 0.56 7.41
